# Supplementary material
Source: PubMed Central journal article supplement (PMC6129228)
Supplement: NIHMS954182-supplement-1.pdf [file NIHMS954182-supplement-1.pdf]

**Table S1. Repeat elements classified de novo by RepeatModeler.** The overall repeat content of the gerbil assembly (33.82%) is somewhat less than initially reported for the mouse genome (38.6%) [105]; this apparent difference may be due to filtering or assembly artifacts and will require alternative approaches such as long read sequencing to resolve.

|                    | # of elements | Length occupied | Percentage of sequence |
|--------------------|---------------|-----------------|------------------------|
| SINEs              | 9289          | 801,082 bp      | 0.03%                  |
| LINEs              | 656,548       | 340,218,809 bp  | 13.48%                 |
| LINE1              | 656,548       | 340,218,809 bp  | 13.48%                 |
| LINE2              | 0             | 0               | 0                      |
| L3/CR1             | 0             | 0               | 0                      |
| LTR elements       | 124,571       | 38,784,942 bp   | 1.54%                  |
| ERVL               | 76,924        | 18,475,837 bp   | 0.73%                  |
| ERVL-MaLRs         | 0             | 0               | 0                      |
| ERV classI         | 15,618        | 8,397,247 bp    | 0.33%                  |
| ERV-classII        | 26,542        | 10,925,795 bp   | 0.43%                  |
| DNA elements       | 30,507        | 6,158,874 bp    | 0.24%                  |
| hAT-Charlie        | 30,507        | 6,158,874 bp    | 0.24%                  |
| TcMar-Tigger       | 0             | 0               | 0                      |
| Unclassified       | 2,182,352     | 398,059,747 bp  | 15.78%                 |
|                    |               |                 |                        |
| Total bases masked | 3,809,406     | 853,387,920 bp  | 33.82%                 |
