# Supplementary material
Source: PubMed Central journal article supplement (PMC6129228)
Supplement: NIHMS954182-supplement-2.pdf [file NIHMS954182-supplement-2.pdf]

**Table S2. Genome assembly completeness assessment by BUSCO versus the Euarchontoglires unique single-copy ortholog database version 9.** The high percentage of BUSCOs detected (C+F = 98.5%) indicates near complete capture of the expected single copy ortholog genes in this gerbil assembly and annotation, while the number of fragmented BUSCOs (F=4.9%) is consistent with the current somewhat fragmented state of the assembly.

| <b>Species</b>         | <b>Size</b>            | <b>BUSCO notation assessment results versus Euarchontoglires</b> |
|------------------------|------------------------|------------------------------------------------------------------|
| <i>M. unguiculatus</i> | 2523 Mbp<br>38,750 CDS | C:93.6% [S:53.5%, D:40.1%], F:4.9%, M:1.5%, n:6192               |
