# Supplementary material
Source: PubMed Central journal article supplement (PMC6129228)
Supplement: NIHMS954182-supplement-3.pdf [file NIHMS954182-supplement-3.pdf]

**Table S3. Blastp versus the UniProtKB/SwissProt curated protein collection (top, Gerbil vs mouse match rates for comparison) and ProSplign protein alignments to RefSeq proteins from human and mouse (bottom).** The gerbil protein set exhibits a slightly higher alignment rate against mouse (84.55%) versus against human (80.25%), as expected.

|                              | Meriones unguiculatus<br>Release 100 | Mus musculus<br>Release 106 |
|------------------------------|--------------------------------------|-----------------------------|
| Total proteins as query      | 21,908                               |                             |
| Match >= 95% of query length | 18,517                               | 19,480                      |
| Match >=50% of query length  | 21,645                               | 21,267                      |
|                              |                                      |                             |
|                              | Homo sapiens                         | Mus musculus                |
| Total Entrez sequences       | 48,460                               | 30,831                      |
| Number (%) aligned           | 46,947 (96.88%)                      | 30,114 (97.67%)             |
| Average % identity           | 75.32%                               | 76.03%                      |
| Average % aligned            | 80.25%                               | 84.55%                      |
